# Supplementary material
Source: PubMed Central journal article supplement (PMC4027389)
Supplement: rspb20132768supp1.pdf [file rspb20132768supp1.pdf]

## **Saslis-Lagoudakis et al. The evolution of traditional knowledge: environment shapes medicinal plant use in Nepal**

### **Electronic Supplementary Material (ESM)**

#### 1. Supporting studies

##### 1.1 Phylogenetic versus taxonomic estimates of the similarity of medicinal floras

Our study incorporates an estimate of the phylogeny of cultures based on language group membership, and an explicit phylogeny of plant relatedness. Our rationale for incorporating a plant phylogeny is that substitution by a closely related plant may take place if the plant traditionally used is not present in the floristic environment. Whilst a phylogenetic approach can account for this type of vertical cultural transmission, more traditional taxonomic approaches cannot (Figure S1). Here we take a traditional taxonomic approach and compare the findings under traditional and phylogenetic estimates of the relatedness of medicinal floras. Traditional taxonomic approaches calculate overall similarity between pairs of samples, and use the numbers of taxa in each sample and the number of taxa found in both samples to calculate a quotient of similarity ranging from 0 to 1.

To calculate pairwise floristic distances for both the floristic environments and medicinal floras of the different ethnic groups, the Sørensen similarity index [1] was calculated and subtracted from unity. The resultant distance matrices are shown in Tables S5 and S6 for the floristic environments and medicinal floras, respectively. The phylogenetic estimate of relatedness of medicinal floras gave a significant correlation against the phylogenetic estimate of relatedness of floristic environment ( $p < 0.001$ ); the taxonomic estimate was also significantly correlated with floristic environment ( $p = 0.04$ ). Neither traditional nor phylogenetic estimates of the similarities between medicinal floras were significantly correlated with culture or geographical proximity of ethnic groups. We reason that use of the

same taxa in medicine may be more likely to be the result of horizontal transfer than use of a related taxon, which would be more likely due to vertical transfer. However, since neither proximity nor ancestry of cultures present significant correlations with medicinal floras the traditional approaches offer no additional insight over the phylogenetic approaches in this case. We suggest further studies at species level are needed to tease apart the impact of selection of same versus related plants.

## 1.2 The influence of background differences in floristic environment

We investigated if culture is correlated with medicinal flora after background differences in local floras have been accounted for by performing a partial Mantel test [2]. A basic Mantel test allows for the comparison between the distance matrices for two variables. In order to incorporate more variables into the comparison, a partial Mantel test is performed. The partial Mantel test compares two matrices while controlling for a third one. Partial Mantel tests [2] were performed in the “vegan” package in R [3]. The partial Mantel test recovered a non-significant correlation between cultural and medicinal distances ( $p > 0.1$ ). This shows that residual variability in medicinal floras is not significantly structured by culture, even after removing the effects of the floristic environment.

## References

1. Sørensen T.A. 1948 A method of establishing groups of equal amplitude in plant sociology based on similarity of species content, and its application to analyses of the vegetation on Danish commons. *Kongelige Danske Videnskabernes Selskabs Biologiske Skrifter* **6**, 1-34.
2. Smouse P.E., Long J.C., Sokal R.R. 1986 Multiple regression and correlation extensions of the Mantel test of matrix correspondence. *Systematic Biology* **35**(4), 627-632. (doi:10.2307/2413122).
3. Oksanen J., Kindt R., Legendre P., O’Hara B., Simpson G.L., Solymos P., Stevens H.H., Wagner H. 2009 Vegan: community ecology package. R package version 1.15-4.

## 2. Supplementary Figures

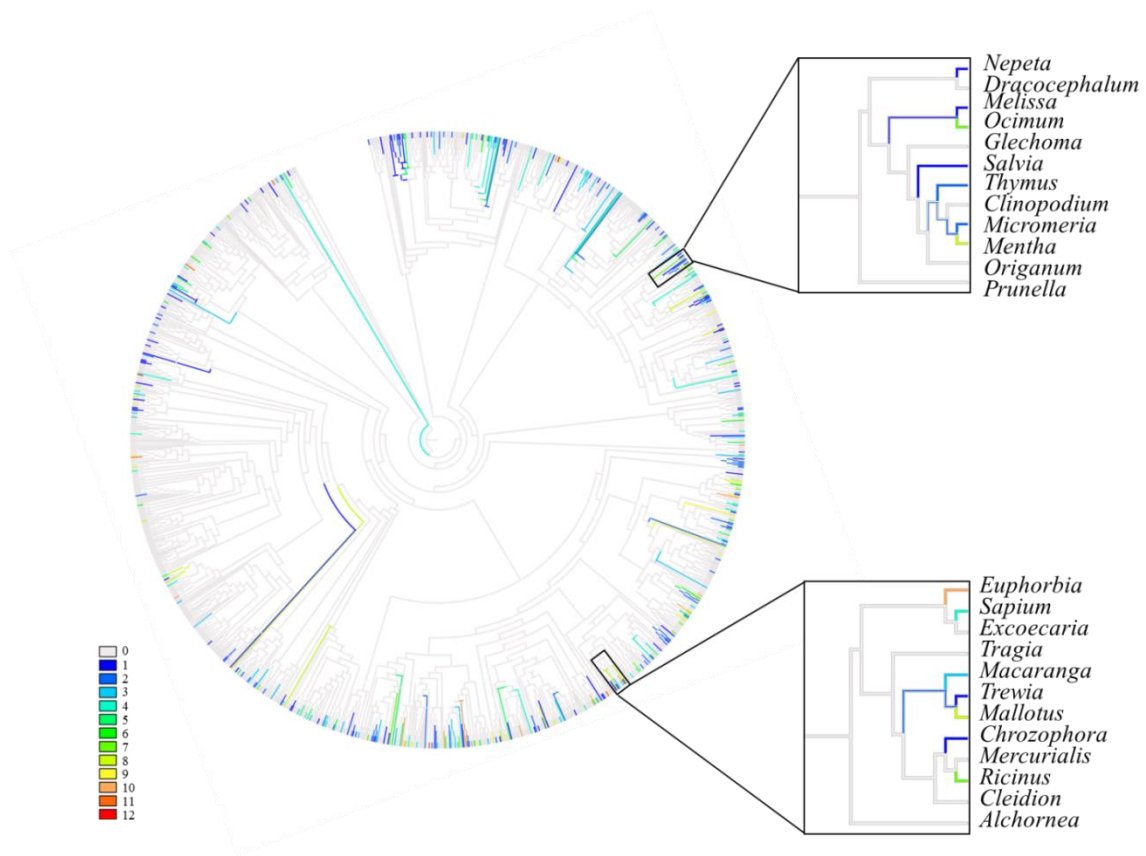

Figure S1. Phylogeny of the flora of Nepal showing phylogenetic distribution of medicinal plants and consensus in use. Branches on the tree are coloured to show the number of cultures using each genus. Red branches show genera used by all cultural groups (12), and dark blue those genera used only by one group. Two example lineages, from the families Lamiaceae and Euphorbiaceae are expanded. Genera marked in orange and green are used by many cultures and would be highlighted as genera with shared use in an approach using taxonomic or phylogenetic measures of similarity. Genera of this kind do not contribute to the signal we recover of medicinal floras converging in floristic environments. On the contrary, genera marked in blue are used by one or few cultures. Phylogenetic shared use of this kind would not be recovered using a taxonomic approach, because it is based on numbers of taxa used in common. However, our phylogenetic measures of similarity are able to distinguish between the use of unrelated or closely related taxa.

### 3. Supplementary Tables

Table S1. Distance matrix of languages of the 12 ethnic groups in Nepal calculated based on language classification.

|         | Chepang | Danuwar | Tamang | Magar | Majhi | Limbu | Sunuwar | Tharu | Gurung | Raute | Sherpa | Lepcha |
|---------|---------|---------|--------|-------|-------|-------|---------|-------|--------|-------|--------|--------|
| Chepang | 0       | 10      | 6      | 2     | 11    | 4     | 2       | 10    | 6      | 4     | 7      | 5      |
| Danuwar | 10      | 0       | 10     | 10    | 3     | 10    | 10      | 1     | 10     | 10    | 11     | 9      |
| Tamang  | 6       | 10      | 0      | 6     | 11    | 6     | 6       | 10    | 0      | 6     | 3      | 3      |
| Magar   | 2       | 10      | 6      | 0     | 11    | 4     | 2       | 10    | 6      | 4     | 7      | 5      |
| Majhi   | 11      | 3       | 11     | 11    | 0     | 11    | 11      | 3     | 11     | 11    | 12     | 10     |
| Limbu   | 4       | 10      | 6      | 4     | 11    | 0     | 4       | 10    | 6      | 2     | 7      | 5      |
| Sunuwar | 2       | 10      | 6      | 2     | 11    | 4     | 0       | 10    | 6      | 4     | 7      | 5      |
| Tharu   | 10      | 1       | 10     | 10    | 3     | 10    | 10      | 0     | 10     | 10    | 11     | 9      |
| Gurung  | 6       | 10      | 0      | 6     | 11    | 6     | 6       | 10    | 0      | 6     | 3      | 3      |
| Raute   | 4       | 10      | 6      | 4     | 11    | 2     | 4       | 10    | 6      | 0     | 7      | 5      |
| Sherpa  | 7       | 11      | 3      | 7     | 12    | 7     | 7       | 11    | 3      | 7     | 0      | 4      |
| Lepcha  | 5       | 9       | 3      | 5     | 10    | 5     | 5       | 9     | 3      | 5     | 4      | 0      |

Table S2. Distance matrix of floristic environments for the 12 ethnic groups in Nepal calculated with “comstuctnn” in PHYLOCOM using a phylogenetic tree of the flora of Nepal, based on plant and ethnic group distribution data.

|         | Chepang | Danuwar | Tamang | Magar  | Majhi  | Limbu  | Sunwar | Tharu  | Gurung | Raute  | Sherpa | Lepcha |
|---------|---------|---------|--------|--------|--------|--------|--------|--------|--------|--------|--------|--------|
| Chepang | 0.0000  | 0.0000  | 0.0000 | 0.0000 | 0.0000 | 0.0123 | 0.0123 | 0.0000 | 0.0000 | 0.0193 | 0.0124 | 0.0124 |
| Danuwar | 0.0000  | 0.0000  | 0.0000 | 0.0000 | 0.0000 | 0.0123 | 0.0123 | 0.0000 | 0.0000 | 0.0193 | 0.0124 | 0.0124 |
| Tamang  | 0.0000  | 0.0000  | 0.0000 | 0.0000 | 0.0000 | 0.0123 | 0.0123 | 0.0000 | 0.0000 | 0.0193 | 0.0124 | 0.0124 |
| Magar   | 0.0000  | 0.0000  | 0.0000 | 0.0000 | 0.0038 | 0.0146 | 0.0146 | 0.0000 | 0.0104 | 0.0245 | 0.0146 | 0.0146 |
| Majhi   | 0.0000  | 0.0000  | 0.0000 | 0.0038 | 0.0000 | 0.0109 | 0.0109 | 0.0000 | 0.0067 | 0.0238 | 0.0110 | 0.0110 |
| Limbu   | 0.0123  | 0.0123  | 0.0123 | 0.0146 | 0.0109 | 0.0000 | 0.0000 | 0.0000 | 0.0082 | 0.0222 | 0.0001 | 0.0001 |
| Sunwar  | 0.0123  | 0.0123  | 0.0123 | 0.0146 | 0.0109 | 0.0000 | 0.0000 | 0.0000 | 0.0082 | 0.0222 | 0.0001 | 0.0001 |
| Tharu   | 0.0000  | 0.0000  | 0.0000 | 0.0000 | 0.0000 | 0.0000 | 0.0000 | 0.0000 | 0.0104 | 0.0245 | 0.0146 | 0.0146 |
| Gurung  | 0.0000  | 0.0000  | 0.0000 | 0.0104 | 0.0067 | 0.0082 | 0.0082 | 0.0104 | 0.0000 | 0.0193 | 0.0124 | 0.0124 |
| Raute   | 0.0193  | 0.0193  | 0.0193 | 0.0245 | 0.0238 | 0.0222 | 0.0222 | 0.0245 | 0.0193 | 0.0000 | 0.0120 | 0.0120 |
| Sherpa  | 0.0124  | 0.0124  | 0.0124 | 0.0146 | 0.0110 | 0.0001 | 0.0001 | 0.0146 | 0.0124 | 0.0120 | 0.0000 | 0.0000 |
| Lepcha  | 0.0124  | 0.0124  | 0.0124 | 0.0146 | 0.0110 | 0.0001 | 0.0001 | 0.0146 | 0.0124 | 0.0120 | 0.0000 | 0.0000 |

Table S3. Distance matrix of medicinal floras for the 12 ethnic groups in Nepal calculated with “comstuctnn” in PHYLOCOM using a phylogenetic tree of the flora of Nepal, based on ethnobotanical information.

|         | Chepang | Danuwar | Tamang | Magar  | Majhi  | Limbu  | Sunwar | Tharu  | Gurung | Raute  | Sherpa | Lepcha |
|---------|---------|---------|--------|--------|--------|--------|--------|--------|--------|--------|--------|--------|
| Chepang | 0.0000  | 0.0659  | 0.0190 | 0.0597 | 0.1136 | 0.1134 | 0.1217 | 0.0715 | 0.0372 | 0.1614 | 0.1340 | 0.1176 |
| Danuwar | 0.0659  | 0.0000  | 0.0227 | 0.0479 | 0.1025 | 0.0931 | 0.0943 | 0.0410 | 0.0345 | 0.1653 | 0.1282 | 0.0934 |
| Tamang  | 0.0190  | 0.0227  | 0.0000 | 0.0717 | 0.1311 | 0.1267 | 0.1334 | 0.0918 | 0.0445 | 0.1760 | 0.1217 | 0.1330 |
| Magar   | 0.0597  | 0.0479  | 0.0717 | 0.0000 | 0.1140 | 0.0860 | 0.0948 | 0.0579 | 0.0198 | 0.1680 | 0.1149 | 0.0950 |
| Majhi   | 0.1136  | 0.1025  | 0.1311 | 0.1140 | 0.0000 | 0.1150 | 0.1227 | 0.0552 | 0.0391 | 0.1341 | 0.1384 | 0.1197 |
| Limbu   | 0.1134  | 0.0931  | 0.1267 | 0.0860 | 0.1150 | 0.0000 | 0.0433 | 0.0333 | 0.0142 | 0.1867 | 0.1139 | 0.0383 |
| Sunwar  | 0.1217  | 0.0943  | 0.1334 | 0.0948 | 0.1227 | 0.0433 | 0.0000 | 0.0127 | 0.0128 | 0.1745 | 0.1112 | 0.0219 |
| Tharu   | 0.0715  | 0.0410  | 0.0918 | 0.0579 | 0.0552 | 0.0333 | 0.0127 | 0.0000 | 0.0355 | 0.1651 | 0.1278 | 0.0940 |
| Gurung  | 0.0372  | 0.0345  | 0.0445 | 0.0198 | 0.0391 | 0.0142 | 0.0128 | 0.0355 | 0.0000 | 0.1808 | 0.1162 | 0.1230 |
| Raute   | 0.1614  | 0.1653  | 0.1760 | 0.1680 | 0.1341 | 0.1867 | 0.1745 | 0.1651 | 0.1808 | 0.0000 | 0.1590 | 0.1127 |
| Sherpa  | 0.1340  | 0.1282  | 0.1217 | 0.1149 | 0.1384 | 0.1139 | 0.1112 | 0.1278 | 0.1162 | 0.1590 | 0.0000 | 0.1501 |
| Lepcha  | 0.1176  | 0.0934  | 0.1330 | 0.0950 | 0.1197 | 0.0383 | 0.0219 | 0.0940 | 0.1230 | 0.1127 | 0.1501 | 0.0000 |

Table S4. Distance matrix of geographical distances for the 12 ethnic groups in Nepal based on their distributions in the country.

|         | Chepang  | Danuwar  | Tamang   | Magar    | Majhi    | Limbu    | Sunuwar  | Tharu    | Gurung   | Raute    | Sherpa   | Lepcha   |
|---------|----------|----------|----------|----------|----------|----------|----------|----------|----------|----------|----------|----------|
| Chepang | 0.0000   | 21.8378  | 47.4129  | 124.4317 | 133.9836 | 274.2496 | 134.4675 | 284.2675 | 82.7200  | 390.7776 | 171.8385 | 370.1825 |
| Danuwar | 21.8378  | 0.0000   | 52.7427  | 141.4247 | 117.9519 | 261.5355 | 122.3253 | 291.2171 | 104.1058 | 407.7229 | 163.4641 | 357.8052 |
| Tamang  | 47.4129  | 52.7427  | 0.0000   | 149.9049 | 118.2826 | 251.2662 | 113.5822 | 303.6552 | 93.7172  | 412.4692 | 147.2930 | 346.2004 |
| Magar   | 124.4317 | 141.4247 | 149.9049 | 0.0000   | 258.2183 | 396.8988 | 257.6362 | 243.8775 | 79.7628  | 266.7835 | 290.6042 | 492.1418 |
| Majhi   | 133.9836 | 117.9519 | 118.2826 | 258.2183 | 0.0000   | 146.8490 | 29.8427  | 362.2232 | 206.3393 | 524.7555 | 74.8022  | 242.8618 |
| Limbu   | 274.2496 | 261.5355 | 251.2662 | 396.8988 | 146.8490 | 0.0000   | 139.7848 | 470.9538 | 334.2985 | 661.2459 | 111.3024 | 96.3204  |
| Sunuwar | 134.4675 | 122.3253 | 113.5822 | 257.6362 | 29.8427  | 139.7848 | 0.0000   | 366.4528 | 198.8968 | 522.9973 | 48.6915  | 235.8206 |
| Tharu   | 284.2675 | 291.2171 | 303.6552 | 243.8775 | 362.2232 | 470.9538 | 366.4528 | 0.0000   | 274.1602 | 248.5581 | 395.1657 | 563.0170 |
| Gurung  | 82.7200  | 104.1058 | 93.7172  | 79.7628  | 206.3393 | 334.2985 | 198.8968 | 274.1602 | 0.0000   | 328.5834 | 224.6035 | 427.4945 |
| Raute   | 390.7776 | 407.7229 | 412.4692 | 266.7835 | 524.7555 | 661.2459 | 522.9973 | 248.5581 | 328.5834 | 0.0000   | 552.2473 | 755.3131 |
| Sherpa  | 171.8385 | 163.4641 | 147.2930 | 290.6042 | 74.8022  | 111.3024 | 48.6915  | 395.1657 | 224.6035 | 552.2473 | 0.0000   | 203.1308 |
| Lepcha  | 370.1825 | 357.8052 | 346.2004 | 492.1418 | 242.8618 | 96.3204  | 235.8206 | 563.0170 | 427.4945 | 755.3131 | 203.1308 | 0.0000   |

Table S5. Distance matrix of floristic environments for the 12 ethnic groups in Nepal calculated with the Sørensen similarity index, based on plant and ethnic group distribution data.

|         | Chepang | Danuwar | Tamang | Magar  | Majhi  | Limbu  | Sunuwar | Tharu  | Gurung | Raute  | Sherpa | Lepcha |
|---------|---------|---------|--------|--------|--------|--------|---------|--------|--------|--------|--------|--------|
| Chepang | 0.0000  | 0.0000  | 0.0000 | 0.1056 | 0.0654 | 0.1887 | 0.1887  | 0.1056 | 0.0000 | 0.2048 | 0.1887 | 0.1887 |
| Danuwar | 0.0000  | 0.0000  | 0.0000 | 0.1056 | 0.0654 | 0.1887 | 0.1887  | 0.1056 | 0.0000 | 0.2048 | 0.1887 | 0.1887 |
| Tamang  | 0.0000  | 0.0000  | 0.0000 | 0.1056 | 0.0654 | 0.1887 | 0.1887  | 0.1056 | 0.0000 | 0.2048 | 0.1887 | 0.1887 |
| Magar   | 0.1056  | 0.1056  | 0.1056 | 0.0000 | 0.0404 | 0.1476 | 0.1476  | 0.0000 | 0.1056 | 0.2341 | 0.1476 | 0.1476 |
| Majhi   | 0.0654  | 0.0654  | 0.0654 | 0.0404 | 0.0000 | 0.1078 | 0.1078  | 0.0404 | 0.0654 | 0.2409 | 0.0793 | 0.0793 |
| Limbu   | 0.1887  | 0.1887  | 0.1887 | 0.1476 | 0.1078 | 0.0000 | 0.0000  | 0.1476 | 0.1887 | 0.2766 | 0.0000 | 0.0000 |
| Sunuwar | 0.1887  | 0.1887  | 0.1887 | 0.1476 | 0.1078 | 0.0000 | 0.0000  | 0.1476 | 0.1887 | 0.2766 | 0.0000 | 0.0000 |
| Tharu   | 0.1056  | 0.1056  | 0.1056 | 0.0000 | 0.0404 | 0.1476 | 0.1476  | 0.0000 | 0.1056 | 0.2341 | 0.1476 | 0.1476 |
| Gurung  | 0.0000  | 0.0000  | 0.0000 | 0.1056 | 0.0654 | 0.1887 | 0.1887  | 0.1056 | 0.0000 | 0.2048 | 0.1887 | 0.1887 |
| Raute   | 0.2048  | 0.2048  | 0.2048 | 0.2341 | 0.2409 | 0.2766 | 0.2766  | 0.2341 | 0.2048 | 0.0000 | 0.2766 | 0.2766 |
| Sherpa  | 0.1887  | 0.1887  | 0.1887 | 0.1476 | 0.0793 | 0.0000 | 0.0000  | 0.1476 | 0.1887 | 0.2766 | 0.0000 | 0.0000 |
| Lepcha  | 0.1887  | 0.1887  | 0.1887 | 0.1476 | 0.0793 | 0.0000 | 0.0000  | 0.1476 | 0.1887 | 0.2766 | 0.0000 | 0.0000 |

Table S6. Distance matrix of medicinal floras for the 12 ethnic groups in Nepal calculated with the Sørensen similarity index, based on ethnobotanical information.

|         | Chepang | Danuwar | Tamang | Magar  | Majhi  | Limbu  | Sunuwar | Tharu  | Gurung | Raute  | Sherpa | Lepcha |
|---------|---------|---------|--------|--------|--------|--------|---------|--------|--------|--------|--------|--------|
| Chepang | 0.0000  | 0.4114  | 0.3362 | 0.3897 | 0.6151 | 0.5809 | 0.6169  | 0.4671 | 0.3740 | 0.7384 | 0.7665 | 0.5985 |
| Danuwar | 0.4114  | 0.0000  | 0.5000 | 0.4211 | 0.5600 | 0.4106 | 0.4184  | 0.3307 | 0.4817 | 0.7558 | 0.7813 | 0.4314 |
| Tamang  | 0.3362  | 0.5000  | 0.0000 | 0.4335 | 0.7000 | 0.6081 | 0.6429  | 0.5279 | 0.3162 | 0.8205 | 0.7108 | 0.6453 |
| Magar   | 0.3897  | 0.4211  | 0.4335 | 0.0000 | 0.6162 | 0.4146 | 0.4330  | 0.4683 | 0.3742 | 0.7882 | 0.6632 | 0.4851 |
| Majhi   | 0.6151  | 0.5600  | 0.7000 | 0.6162 | 0.0000 | 0.7410 | 0.7813  | 0.6237 | 0.7077 | 0.6538 | 0.8710 | 0.7500 |
| Limbu   | 0.5809  | 0.4106  | 0.6081 | 0.4146 | 0.7410 | 0.0000 | 0.1852  | 0.4093 | 0.5431 | 0.8198 | 0.7405 | 0.2448 |
| Sunuwar | 0.6169  | 0.4184  | 0.6429 | 0.4330 | 0.7813 | 0.1852 | 0.0000  | 0.3846 | 0.5859 | 0.8200 | 0.7333 | 0.1970 |
| Tharu   | 0.4671  | 0.3307  | 0.5279 | 0.4683 | 0.6237 | 0.4093 | 0.3846  | 0.0000 | 0.4841 | 0.7215 | 0.7528 | 0.4211 |
| Gurung  | 0.3740  | 0.4817  | 0.3162 | 0.3742 | 0.7077 | 0.5431 | 0.5859  | 0.4841 | 0.0000 | 0.7845 | 0.6349 | 0.5833 |
| Raute   | 0.7384  | 0.7558  | 0.8205 | 0.7882 | 0.6538 | 0.8198 | 0.8200  | 0.7215 | 0.7845 | 0.0000 | 0.8750 | 0.7778 |
| Sherpa  | 0.7665  | 0.7813  | 0.7108 | 0.6632 | 0.8710 | 0.7405 | 0.7333  | 0.7528 | 0.6349 | 0.8750 | 0.0000 | 0.7656 |
| Lepcha  | 0.5985  | 0.4314  | 0.6453 | 0.4851 | 0.7500 | 0.2448 | 0.1970  | 0.4211 | 0.5833 | 0.7778 | 0.7656 | 0.0000 |

Table S7. Pearson product-moment correlation coefficient ( $r$ ) and significance ( $p$ ) of correlations among distance matrices. Floristic environment refers to the distance matrix between the total floras found in each floristic region. Medicinal flora refers to the distance matrix between the medicinal floras used by each ethnic group. Floristic environments and medicinal floras were calculated with a taxonomic approach (Sørensen similarity index). Culture refers to the distance matrix describing cultural relatedness, and based on linguistic affinities. Geography refers to the distance matrix describing geographic proximity of different cultures. n.s.= non-significant.

| <b>Distance Matrix 1</b> | <b>Distance Matrix 2</b> | <b>Correlation coefficient (<math>r</math>)</b> | <b>Significance (<math>p</math> value)</b> |
|--------------------------|--------------------------|-------------------------------------------------|--------------------------------------------|
| Floristic environment    | Medicinal flora          | 0.65                                            | $p < 0.01$                                 |
| Geography                | Medicinal flora          | 0.56                                            | n.s.                                       |
| Culture                  | Medicinal flora          | 0.57                                            | n.s.                                       |
| Geography                | Floristic environment    | 0.72                                            | $p < 0.001$                                |
